# Supplementary material
Source: Research Square preprint supplement (doi:10.21203/rs.3.rs-9668561/v1)
Supplement: Supplementary file 1 [file 93442dc4945f3de0ff36a85e.docx]

**Table 1 Sample Information**

|  | | | | | |
| --- | --- | --- | --- | --- | --- |
| Sample ID | Color | Size/cm（Length×Width×Height） | Description | Sample Pictures | Analytical Techniques | |
| S1 | Blue | 1.40×1.20×0.70 | Impurity, containing white mineral particles among the blue grains | 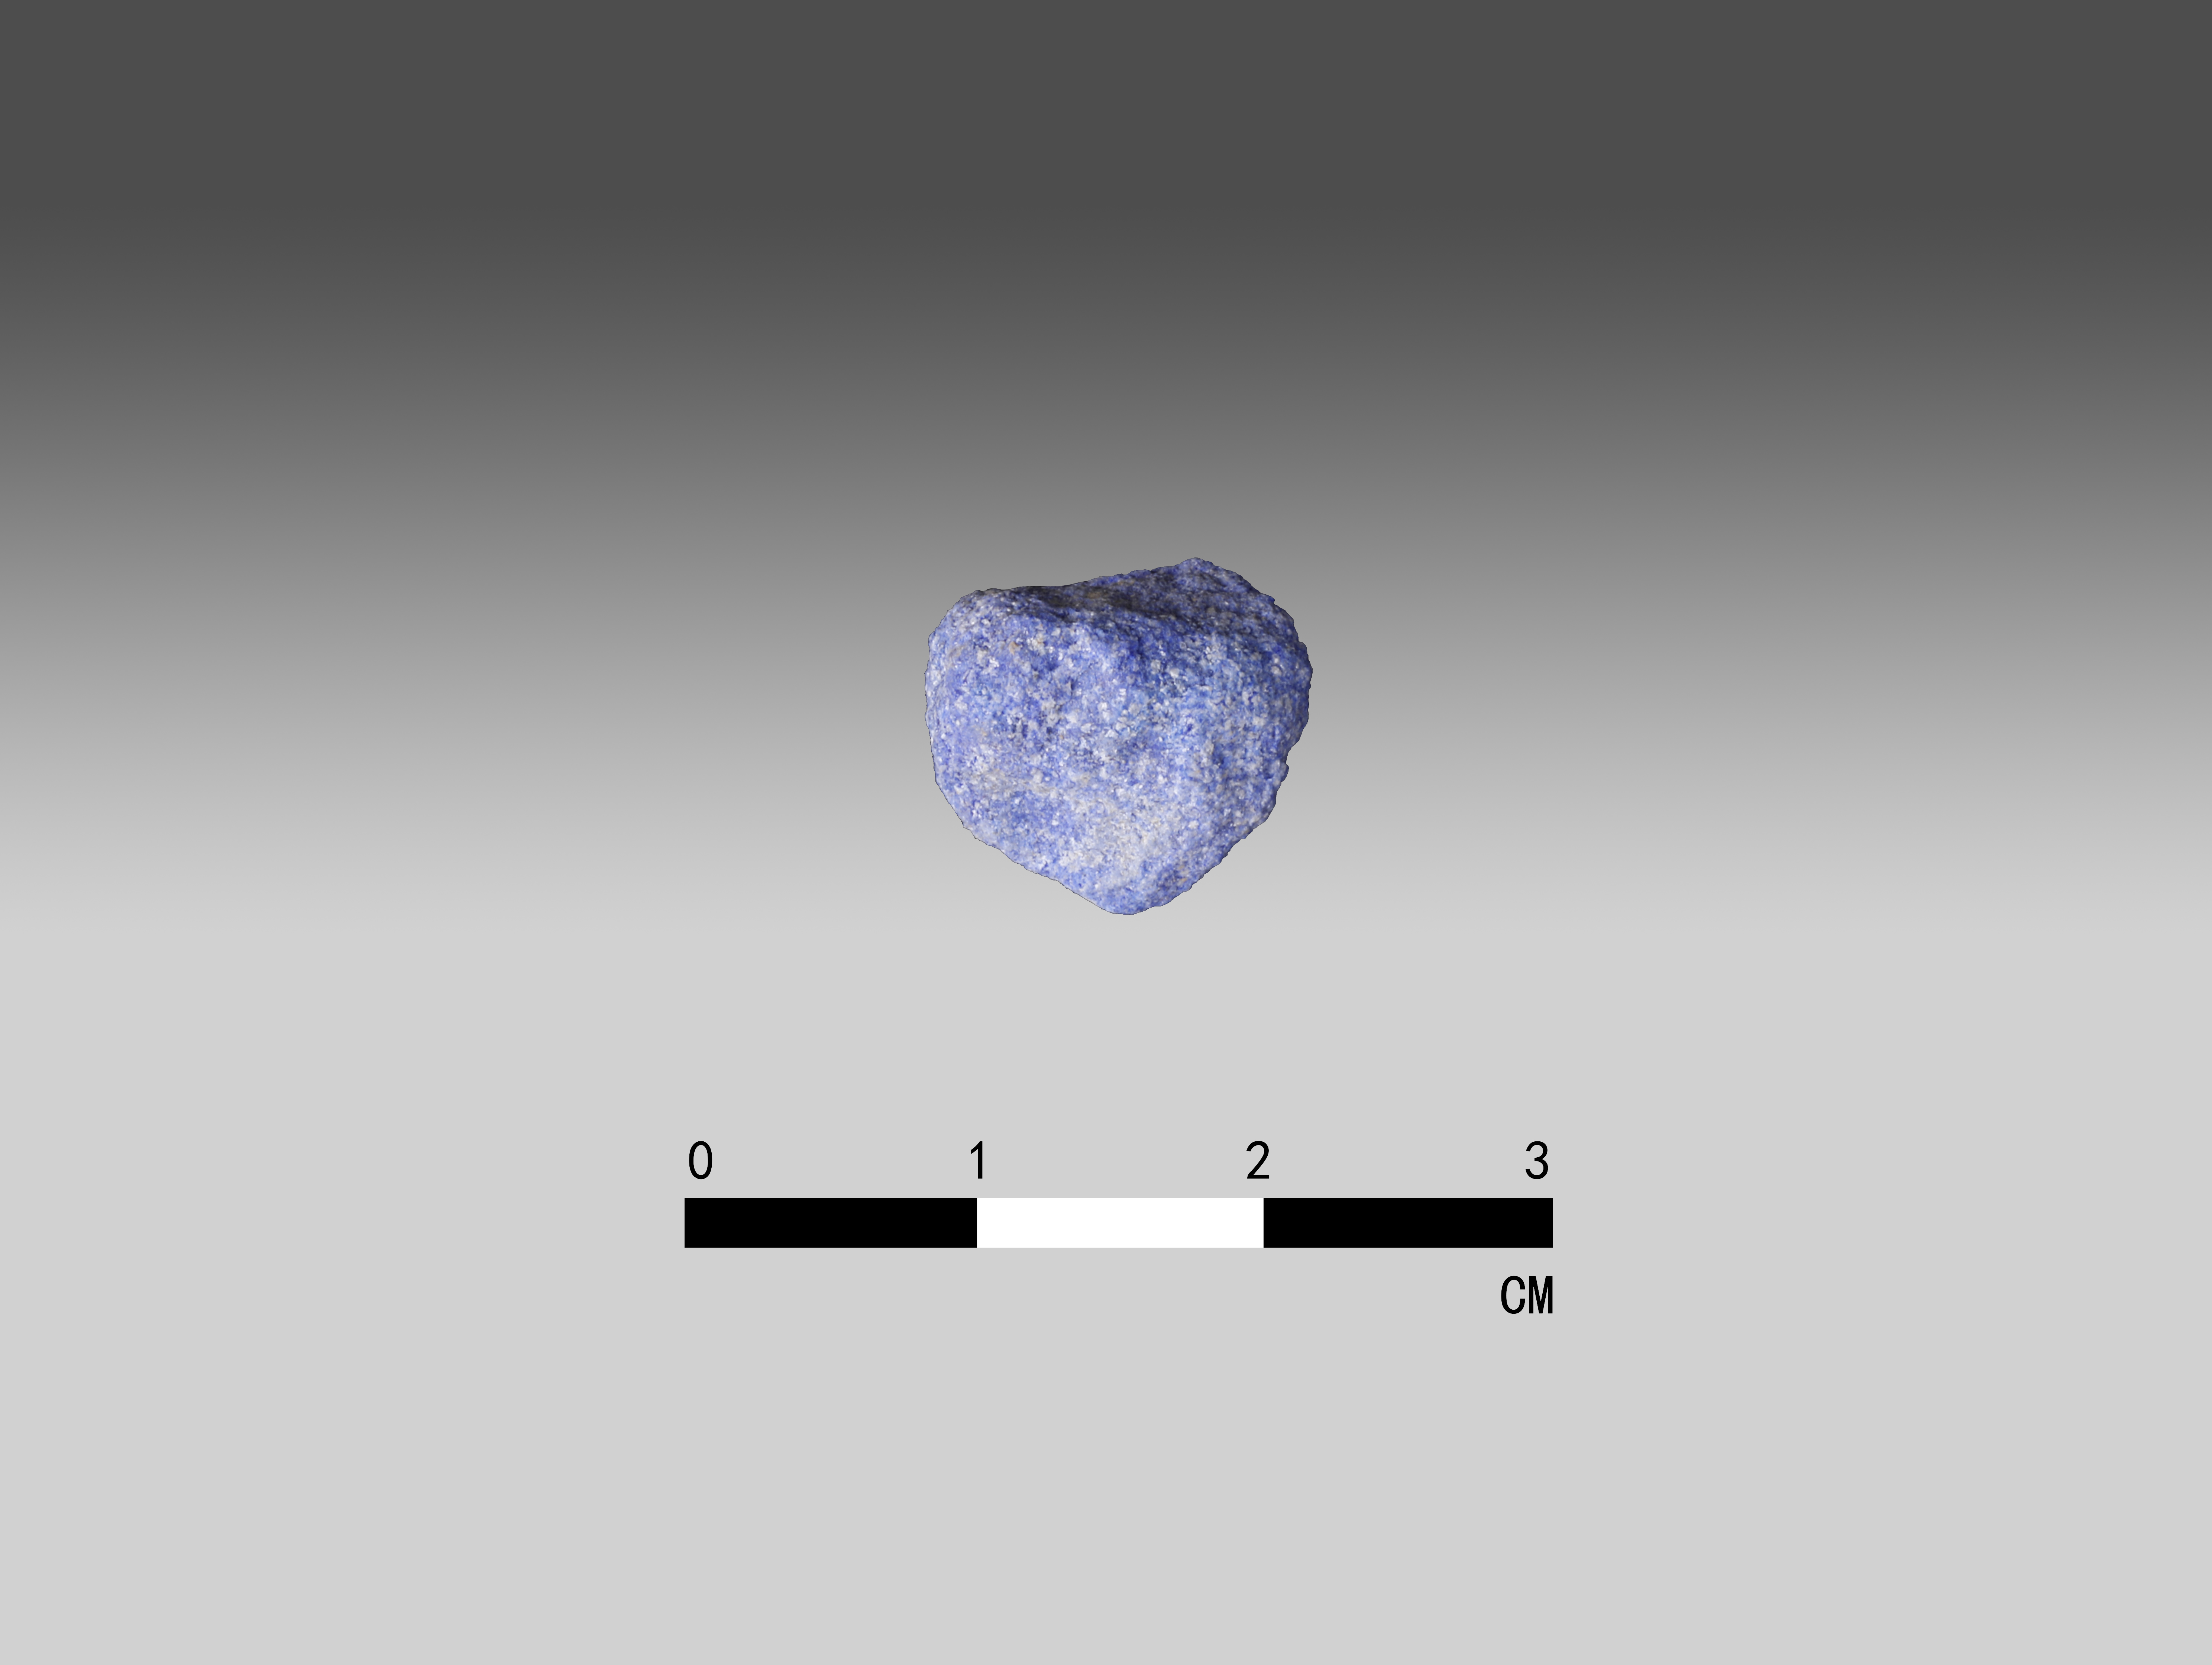 | DM; PLM; SEM-EDS; XRD; *μ‑*RS | |
| S2 | Red | 3.20×2.50×0.90 | high-purity；with few impurities | 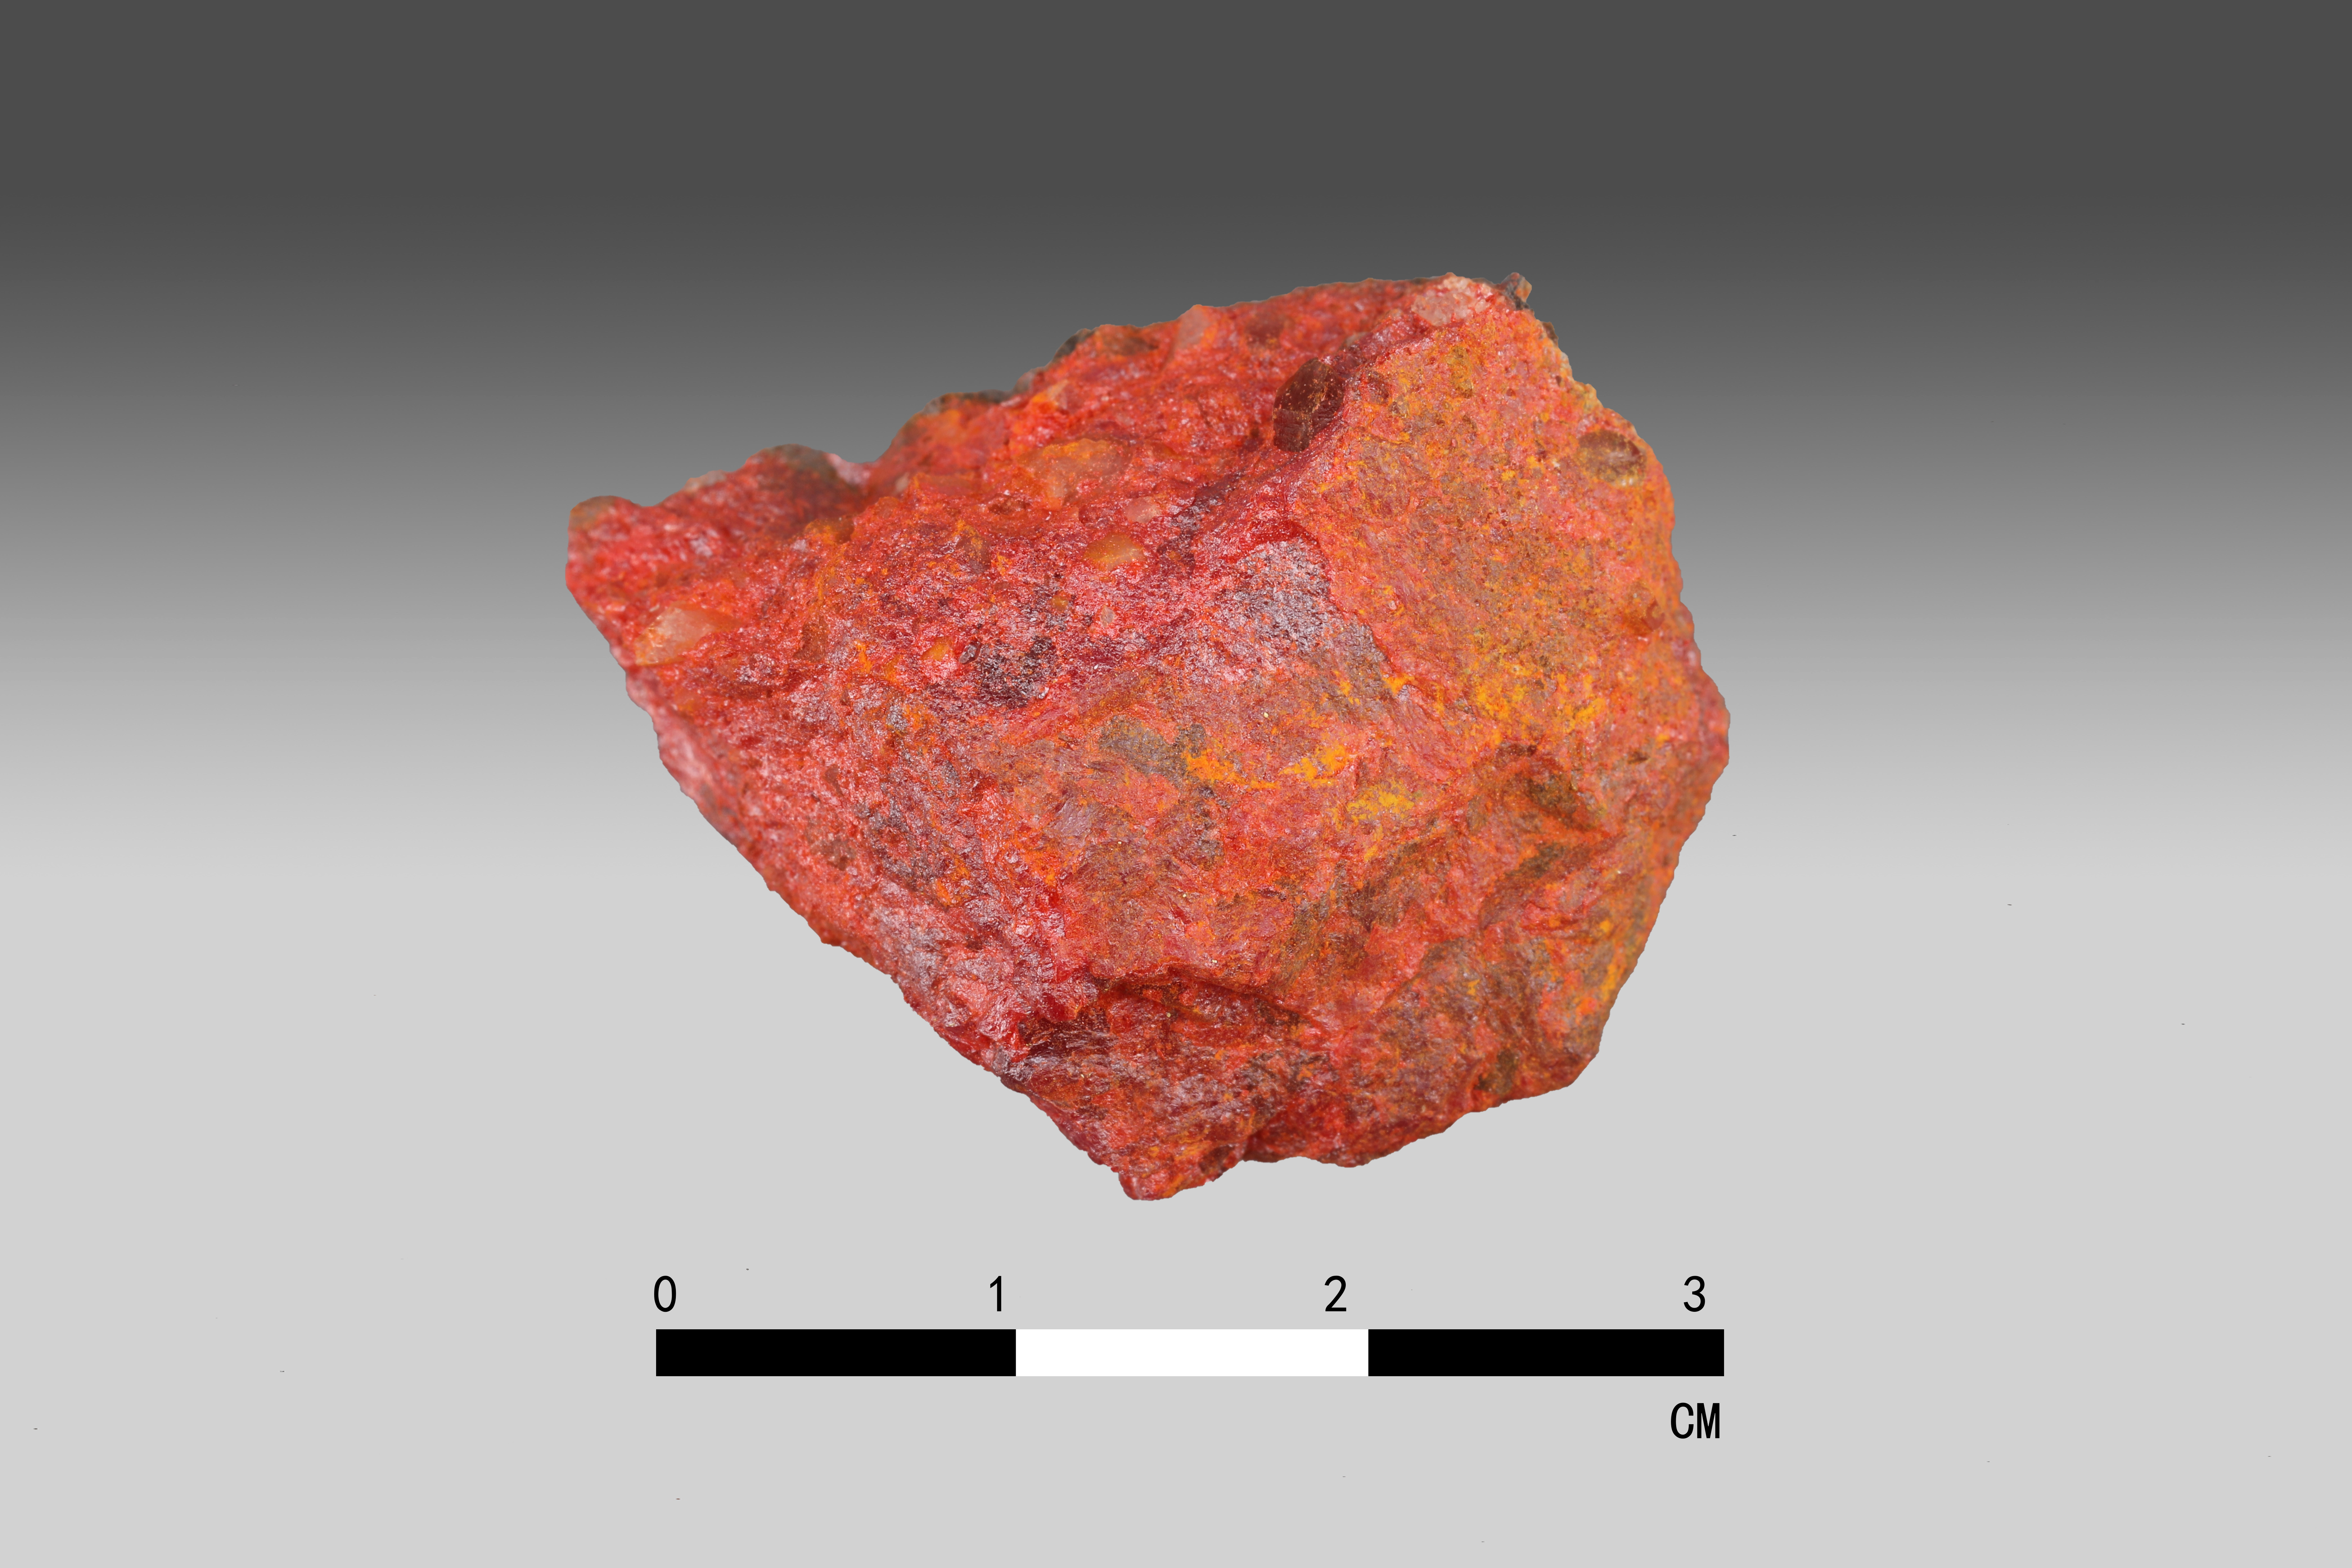 | DM; SEM-EDS; XRD; *μ‑*RS | |
| S3 | Yellow | 3.60×1.90×0.40 | high-purity | 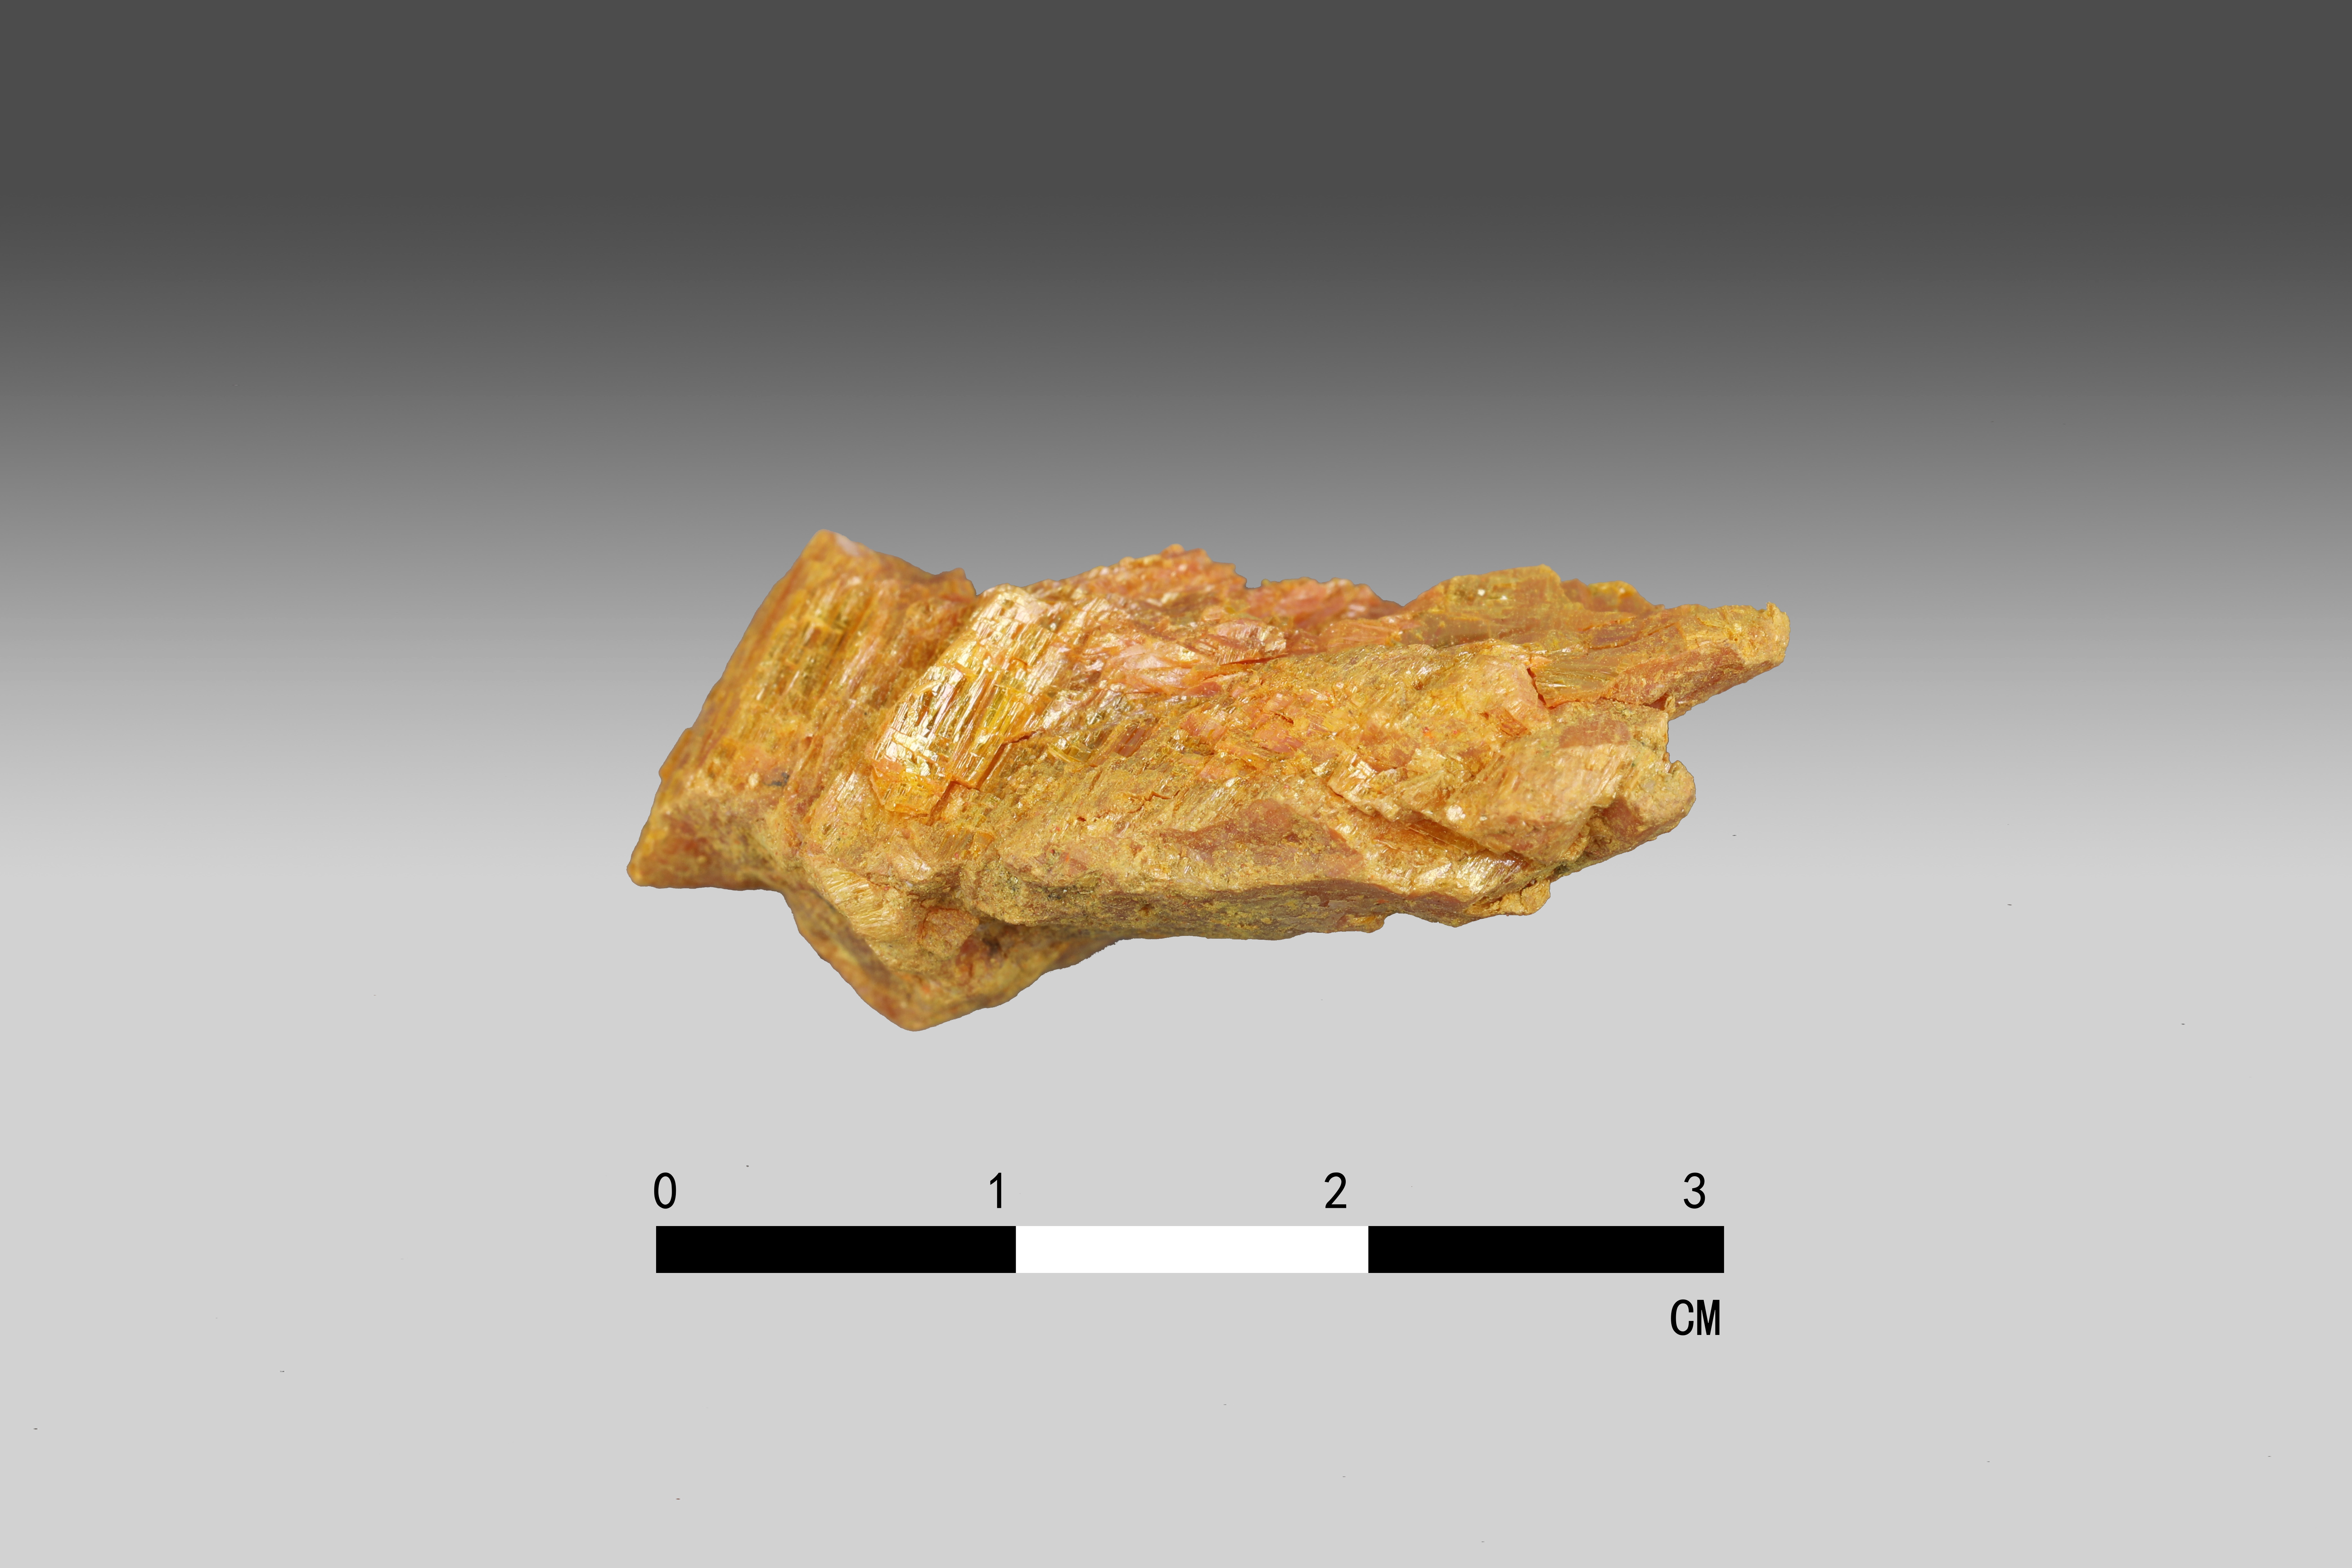 | DM; SEM-EDS; XRD; *μ‑*RS | |
| S4 | Black | 2.40×1.60×0.70 | high-purity | 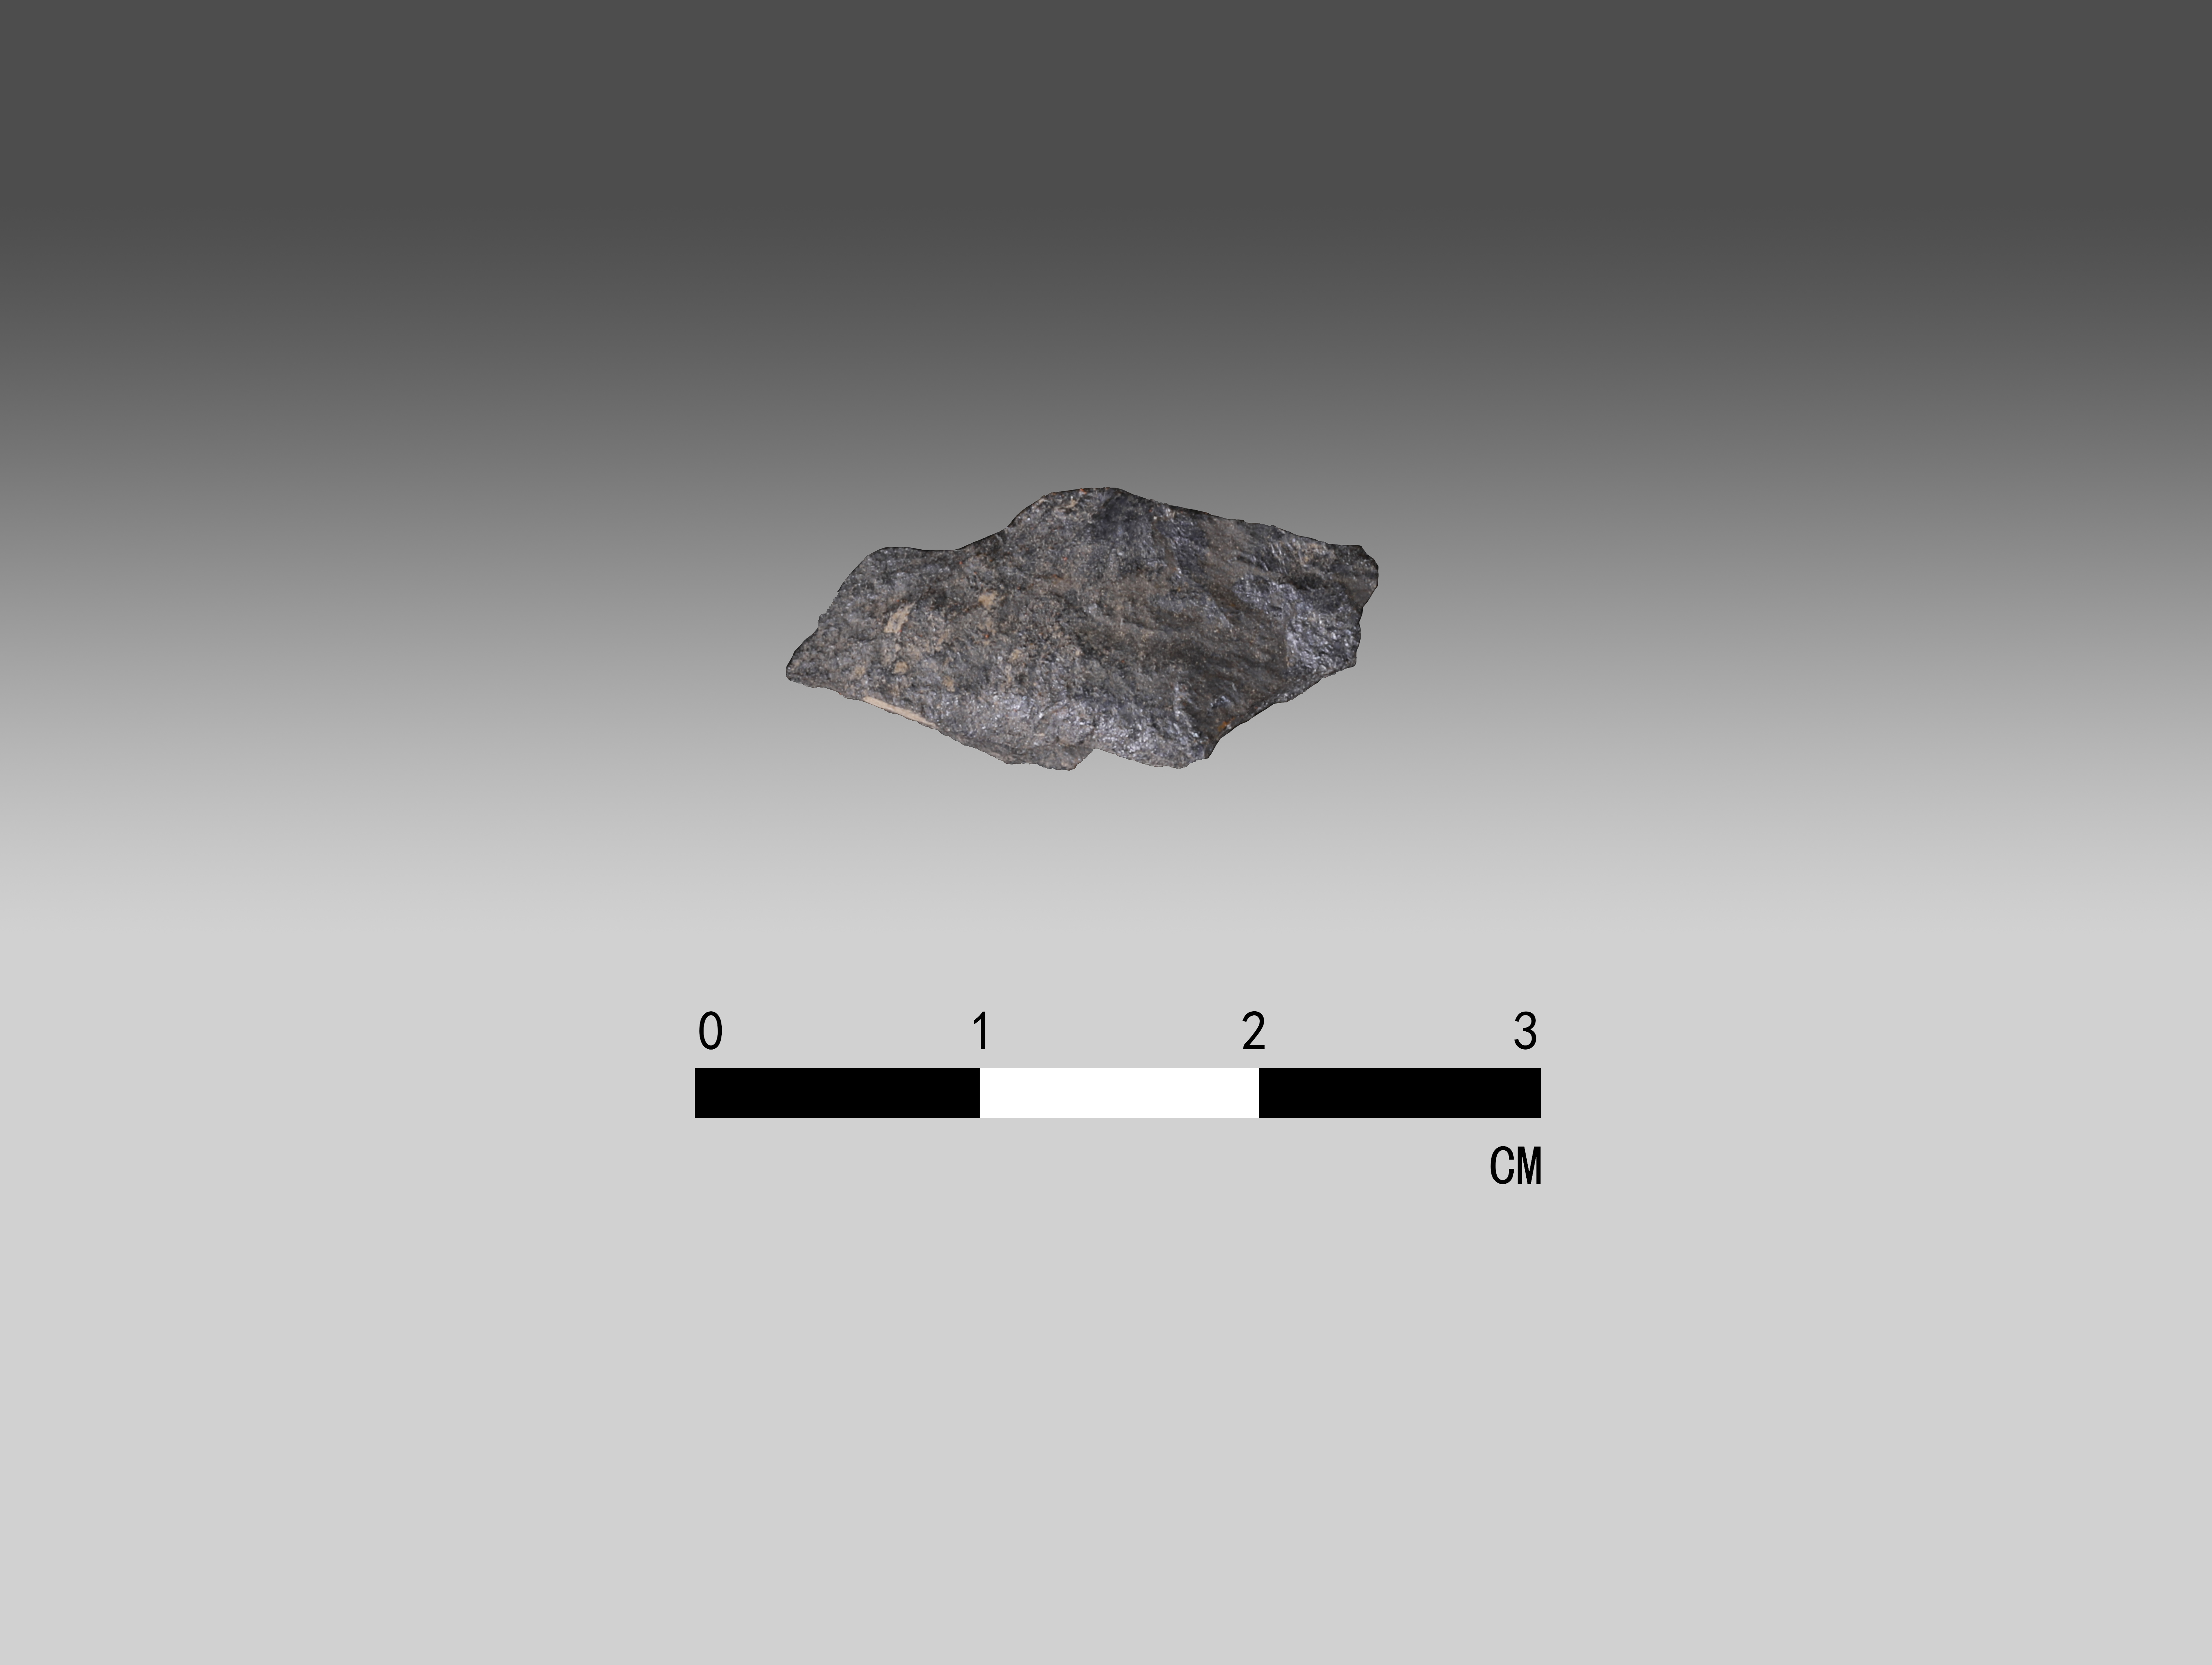 | DM; SEM-EDS; XRD | |
| S5 | White | 1.80×1.50×0.80 | White, pure, transparent, exhibiting a conchoidal fracture | 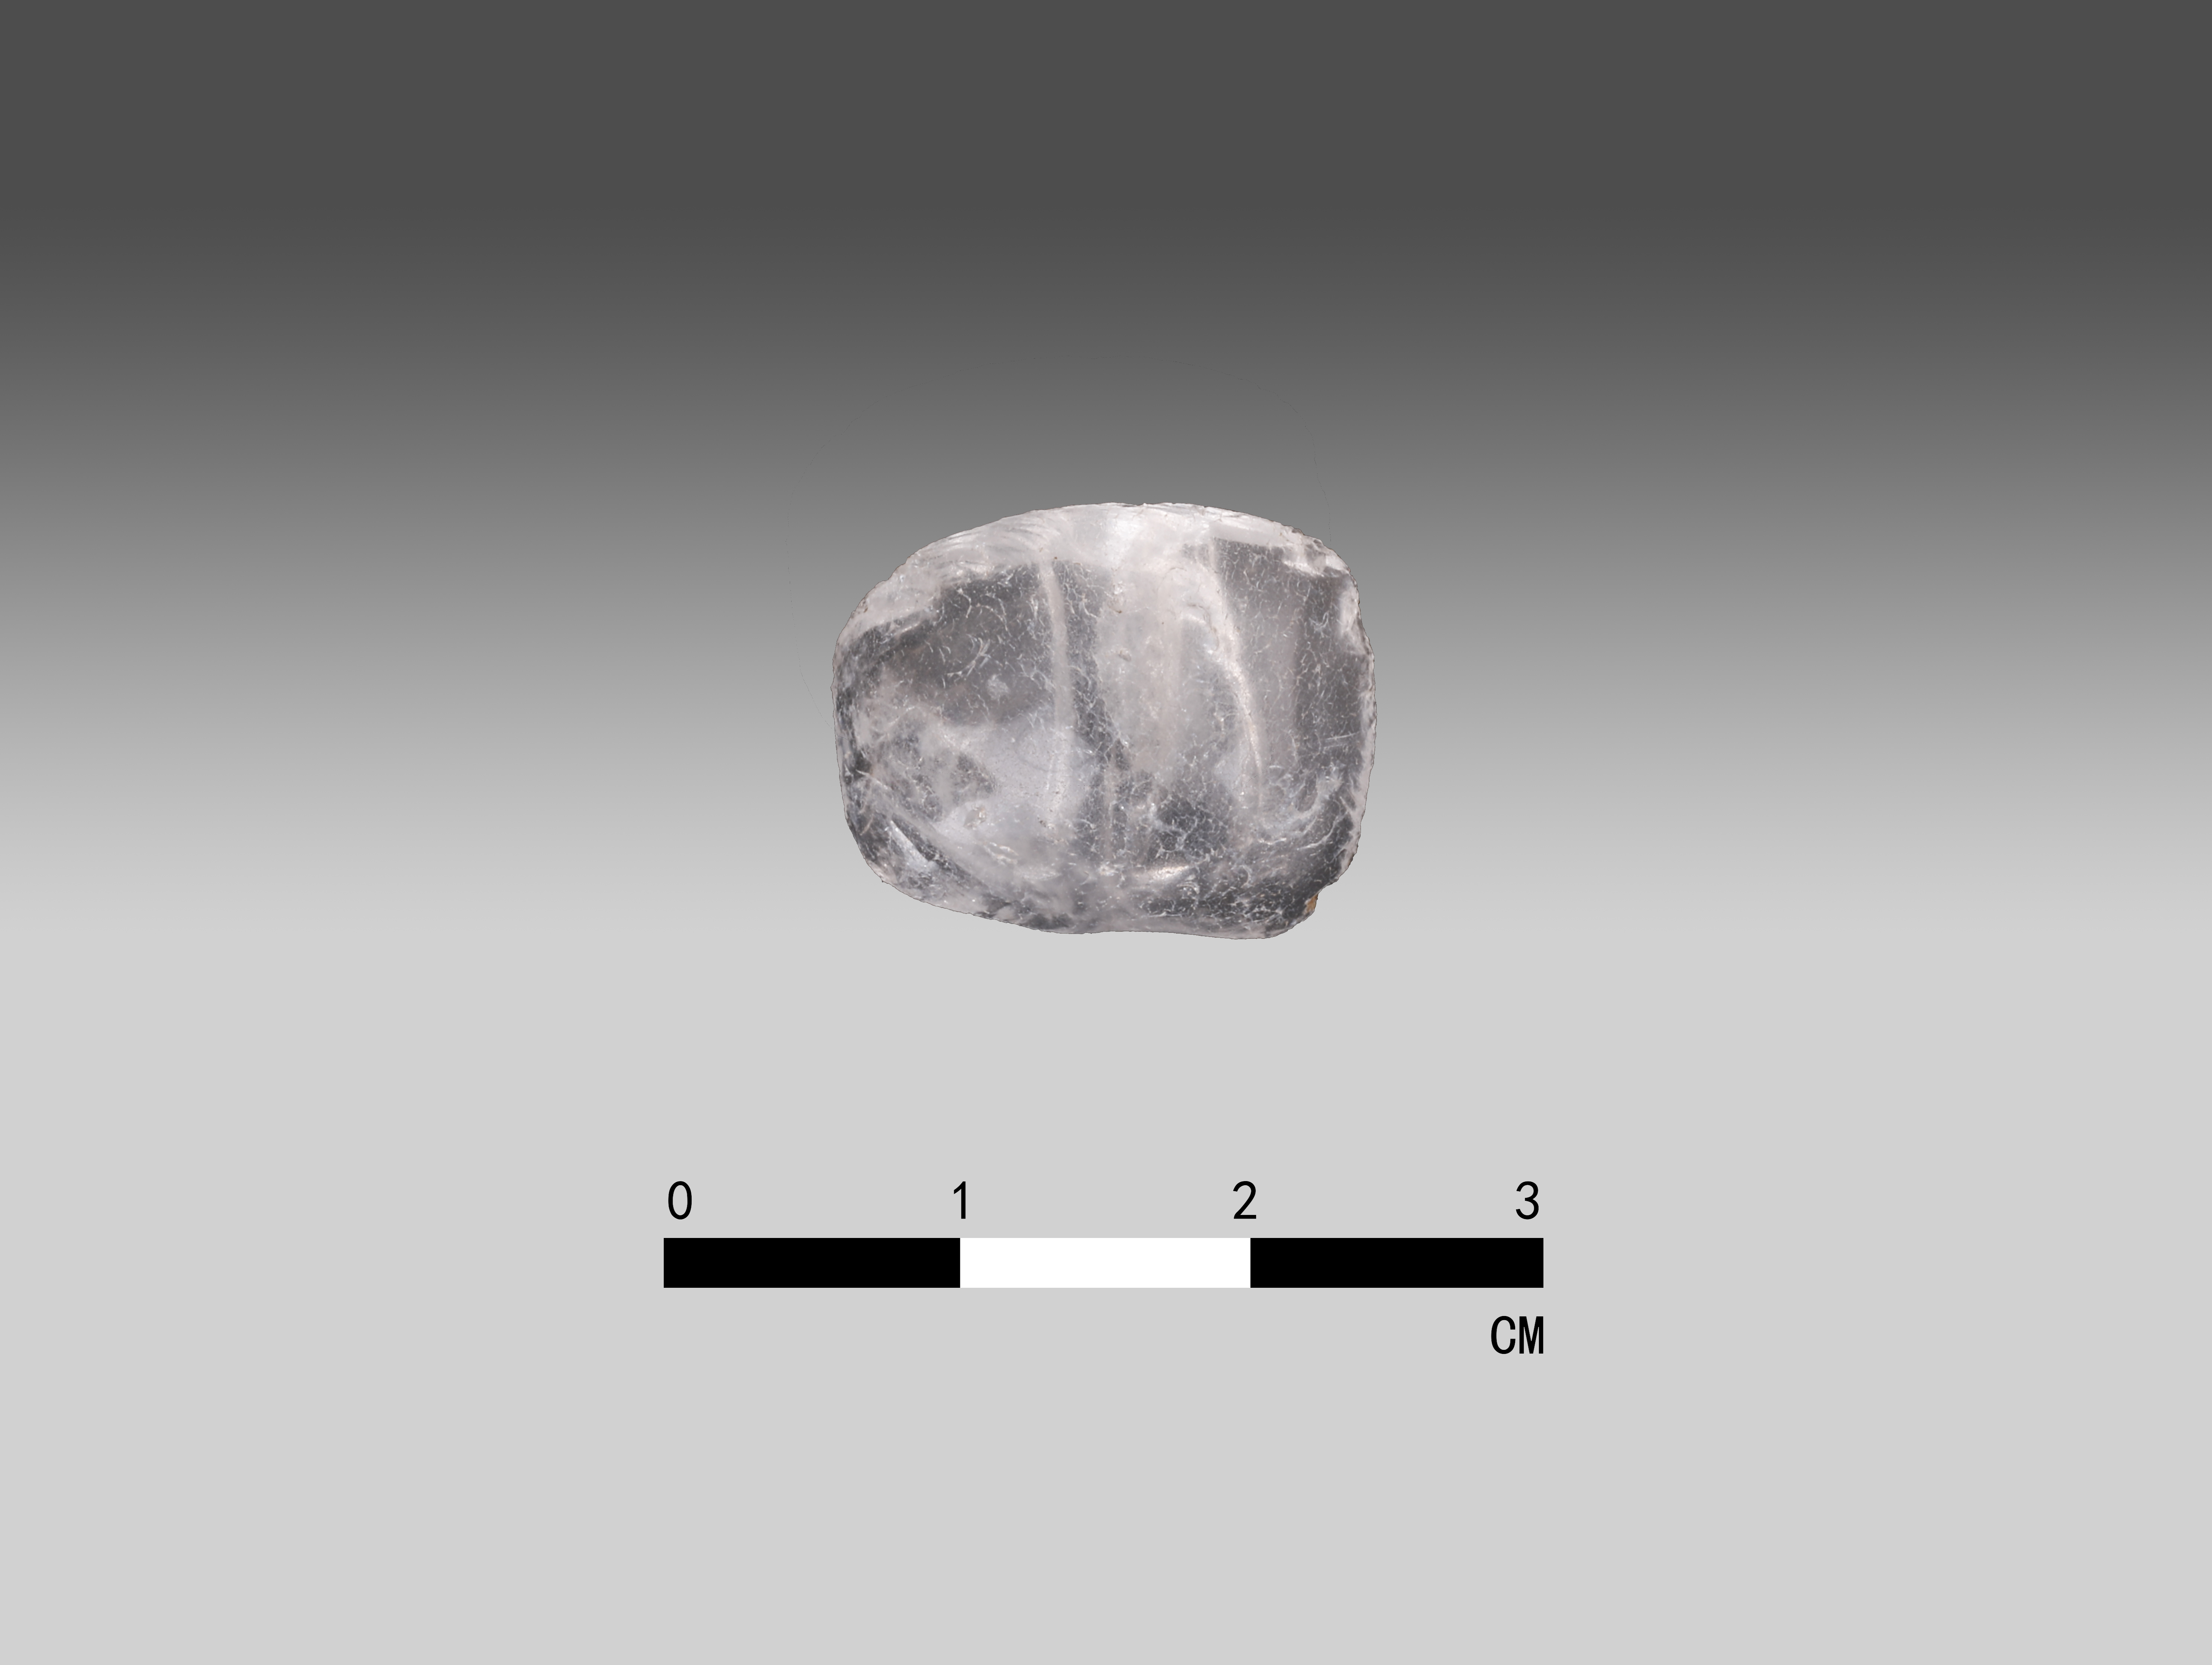 | DM; SEM-EDS; FTIR; *μ‑*RS | |
